# Supplementary material for: Simple phenylpropanoids: recent advances in biological activities, biosynthetic pathways, and microbial production
Source: Royal Society of Chemistry journal article supplement (doi:10.1039/d3np00012e), 2023-10-09
Supplement: d3np00012e1.xlsx [file d3np00012e1.xlsx]

## Sheet: Sheet1
Table 1 Summary of metabolic engineering strategies used in microbial production of simple phenylpropanoids
Category	Product	Host	Substrate/Carbon source	Titer and/or yield	Fermentation type	Strategies	References
phenylpropanoic acids	t-Cinnamic acid (t-CA)	E. coli	L-Phe	4.79 g/L	Fed batch	Overexpressing PlPal from Photorhabdus luminescens in a whole-cell bioconversion system	109 I. Limem, E. Guedon, A. Hehn, F. Bourgaud, L. C. Ghedira, J.-M. Engasser and M. Ghoul, Process Biochem., 2008, 43, 463-479.
		E. coli	Glucose	1.7 g/L	Fed-batch	Designing an alternative metabolic pathway for fermenting glucose to t-CA	112 J. Son, J. H. Jang, I. H. Choi, C. G. Lim, E. J. Jeon, H. Bae Bang and K. J. Jeong, Microbial Cell Factories, 2021, 20, 1-12.
		E. coli	Glucose with casamino acid supplementation	6.9 g/L	Fed-batch	Optimization of PAL gene expression under Trc promoter, optimization of feeding solution supplemented with casamino acid	110 F. Zhang, J. Ren and J. Zhan, Applied Biochemistry and Biotechnology, 2021, 193, 1099-1115.
		C. glutamicum	L-Phe	2.02g/L	Fed-batch	C. glutamicum as a biocatalyst and a micromembrane-based cell recycling system	111 H. B. Bang, K. Lee, Y. J. Lee and K. J. Jeong, Process Biochem., 2018, 68, 30-36
		Synechocystis	L-Phe	0.8 g/L	Fed-batch	Introduction of the Pal enzyme to Synechocystis with high density cultivation	113 S. Masuo, Y. Kobayashi, K.-I. Oinuma and N. Takaya, Appl. Microbiol. Biotechnol., 2016, 100, 8701-8709.
	p-Coumaric acid (p-HCA)	E. coli	Glucose	394.2 mg/L	Shake-flask	Improvement of Tal enzyme by the directed evolution and the high-throughput screening method	120 Y. Kawai, S. Noda, C. Ogino, Y. Takeshima, N. Okai, T. Tanaka and A. Kondo, Microb. Cell Fact., 2013, 12, 1-9.
		E. coli	Glucose	25.62mg/L	Shake-flask	A combined strategy: enhancing the gluconeogenesis pathway, knocking out of the competitive bypass pathway, and using the intracellular vacuolar localization of Tal	123 Y. Huang, X. Jiang, W. Chen, G. Zhang and Q. Wang, Sheng wu Gong Cheng xue bao= Chinese Journal of Biotechnology, 2022, 38, 4553-4566.
		E. coli		2.35 g/L	Fed-batch	Novel Tals with the excellent thermostability and the highest activity	121 Y. Huo, F. Wu, G. Song, R. Tu, W. Chen, E. Hua and Q. Wang, Sheng wu Gong Cheng xue bao= Chinese Journal of Biotechnology, 2020, 36, 2367-2376.
		S. cerevisiae	Xylose	242 mg/L	Fed-batch	Xylose as the carbon source to eliminate the Crabtree effect induced by glucose	86 A. Bergman, V. Siewers, J. Nielsen and Y. Chen, Amb Express, 2016, 6, 1-13.
		S. cerevisiae	Glucose	1.93 g/L	Fed-batch	Overexpressing the feedback-resistant variants (aro4K229L, aro7G141S ) and shikimate kinase, knocking out Aro10 and Pdc5 to reduce the by-products fusel alcohol/acids	92 L. Guo, S. Ding, Y. Liu, C. Gao, G. Hu, W. Song, J. Liu, X. Chen and L. Liu, Biotechnol. Bioeng., 2022, 119, 983-993.
		S. cerevisiae	Glucose	12.5 g/L	Fed-batch	A carbon-rewiring strategy: introducing a phosphoketalose-based pathway and optimizing carbon distribution by replacing the promoters of key genes	125 Y. Li, J. Li, B. Qian, L. Cheng, S. Xu and R. Wang, Molecules, 2018, 23, 3185.
		Synechocystis	Carbon dioxide	196.9mg/L	Shake-flask	Heterologous expression of Pal, C4h and knocking out of the arogenate dehydrogenase gene in the cyano-bacteria Synechocystis sp. PCC6803	127 L. F. Brey, A. J. Włodarczyk, J. F. B. Thøfner, M. Burow, C. Crocoll, I. Nielsen, A. J. Z. Nielsen and P. E. Jensen, Metab. Eng., 2020, 57, 129-139.
	Caffeic acid (CaA)	S. cerevisiae	L-Tyr	289.4 mg/L	Shake-flask	The combinatorial expression of HpaB from Pseudomonas aeruginosa and HpaC from Salmonella enterica to improve the compatibility of heterologous enzymes	139 T. M. Louie, X. S. Xie and L. Xun, Biochemistry, 2003, 42, 7509-7517.
		S. cerevisiae	Glucose	11.432 mg/L	Shake-flask	Expressing C3h from Arabidopsis thaliana, increasing the tyrosine biosynthesis and optimizing the YPD medium with containing 4% glucose	133 P. ZHANG, W. Wenping, Z. Ying and Y. Bangce, Synthetic Biology Journal, 2021, 2, 778.
		S. cerevisiae	Glucose	15.1 mg/L	Shake-flask	A multi-copy chromosomal integration strategy: using codon-optimized Tal, C3h and Cpr1	141 L. Wang, N. Li, S. Yu and J. Zhou, Bioresour. Technol., 2023, 368, 128320.
		S. cerevisiae	Glucose	5.5 g/L	Fed-batch	Optimization of the compatibility of HpaB and HpaC; engineering the cofactor supply and recycling	83 R. Chen, J. Gao, W. Yu, X. Chen, X. Zhai, Y. Chen, L. Zhang and Y. J. Zhou, Nature Chemical Biology, 2022, 18, 520-529.
		E. coli	Glucose	6.17g/L	Fed-batch	Expressing TyrAfbr, both SeC3h (from Saccharothrix espanaensis) and PaHpaC (from Pseudomonas aeruginosa) to reduce p-HCA accumulation; regenerating FAD by PaHpaC	137 Z. Chen, X. Sun, Y. Li, Y. Yan and Q. Yuan, Metab. Eng., 2017, 39, 102-109.
		E. coli	Glucose	7.9 g/L	Fed-batch	A combinatorial engineering strategy: suppression of a competing pathway, enhancing the cofactor FAD and the expression of polyphenol transporters	140 L. Liu, H. Liu, W. Zhang, M. Yao, B. Li, D. Liu and Y. Yuan, Engineering, 2019, 5, 287-295.
		E. coli	Cellulose	233 mg/L	Shake-flask	The simultaneous saccharification and fermentation of kraft pulp, the glucose limitation is crucial for improving caffeic acid yield	143 T. Furuya and K. Kino, Appl. Microbiol. Biotechnol., 2014, 98, 1145-1154.
	Ferulic acid (FA)	E. coli	L-Tyr	257.3 mg/L	Shake-flask	Optimizing C3h and Comt from A. thaliana, instead of CCoAOMT; Adding methionine to M9 minimal medium for increasing SAM supply	151 K. Sun-Young, C. Oksik, L. Jae, H. Bang, U. Tai-Boong and H. Young-Soo, Microb. Cell Fact., 2012. 11, 153.
		E. coli	L-Tyr	212 mg/L	Shake-flask	Optimizing the pathway gene expression (RsTal, SeSam5 and TaComt) by tuning of promoter strengthand copy number, promoting NADPH regeneration and a non-native methionine kinase expression.	152 J. L. Rodrigues, D. Gomes and L. R. Rodrigues, Frontiers in bioengineering and biotechnology, 2020, 8, 59.
		E. coli	Glucose	5.09g/L	Fed-batch	Regenerating the cofactors of SAM and FADH2, eliminating the metabolic shunt	153 H. Lv, Y. Zhang, J. Shao, H. Liu and Y. Wang, Bioresources and Bioprocessing, 2021, 8, 1-12.
		S. cerevisiae	Glucose	3.8 g/L	Fed-batch	Optimizing the efficiency of Comt and accelerated methyl cycle	83 R. Chen, J. Gao, W. Yu, X. Chen, X. Zhai, Y. Chen, L. Zhang and Y. J. Zhou, Nature Chemical Biology, 2022, 18, 520-529.
		S. cerevisiae	Eugenol	16.9 g/L	Fed-batch	Constructing another pathway from eugenol to ferulic acid with vanillyl alcohol oxidase (Vao)	156 V. Vasiliou, A. Pappa and D. R. Petersen, Chemico-biological interactions, 2000, 129, 1-19.
Phenylpropanoic aldehydes	Cinnamaldehyde	E. coli	L-Phe	75 mg/L	Shake-flask	Expressing Pal, 4Cl, Ccr in engineered E. coli, expanding the intracellular pool of precursor phenylalanine	160 S. Liu, Q. Qi, N. Chao, J. Hou, G. Rao, J. Xie, H. Lu, X. Jiang and Y. Gai, Microb. Cell Fact., 2015, 14, 1-14.
		E. coli	Glucose	3.8 g/L	Fed-batch	Systematic metabolic engineering strategies: co-expressing Car and PPTase to improve the conversion of t-CA; deleting endogenous Adh, Aldh to prevent cinnamyl alcohol; increasing cofactors (NADPH, CoA, and ATP); auto-inducible system for antibiotic- and inducer-free production; cultivation with in situ product recovery	165 J. Son, I. H. Choi, C. G. Lim, J. H. Jang, H. B. Bang, J. W. Cha, E. J. Jeon, M. G. Sohn, H. J. Yun and S. C. Kim, J. Agric. Food Chem., 2022, 70, 2656-2663.
	p-Coumaraldehyde	E. coli	p-HCA	49 mg/L	Shake-flask	Overexpressing the artificial bifunctional enzyme (4Cl1–Ccr)	161 H. K. Sibhatu, S. A. Jabasingh, A. Yimam and S. Ahmed, Lwt, 2021, 135, 110009.
	Caffeylaldehyde	E. coli	CaA	19 mg/L	Shake-flask	Overexpressing the artificial bifunctional enzyme (4Cl1–Ccr)	161 H. K. Sibhatu, S. A. Jabasingh, A. Yimam and S. Ahmed, Lwt, 2021, 135, 110009.
	Coniferaldehyde	E. coli	FA	35 mg/L	Shake-flask	Overexpressing the artificial bifunctional enzyme (4Cl1–Ccr)	161 H. K. Sibhatu, S. A. Jabasingh, A. Yimam and S. Ahmed, Lwt, 2021, 135, 110009.
Phenylpropanols	Cinnamyl alcohol	S. cerevisiae	Glucose	27.8 mg/L	Shake-flask	A novel heterologous pathway with ACar, EntD and endogenous alcohol dehydrogenases to improve the conversion of t-CA	162 H. B. Bang, Y. H. Lee, S. C. Kim, C. K. Sung and K. J. Jeong, Microb. Cell Fact., 2016, 15, 1-12.
		E. coli	Glucose	80 mg/L	Shake-flask	A three step biocatalytic cascade: the combination of Pal, Car and Adh	168 C. Zhang, Y. Zang, P. Liu, Z. Zheng and J. Ouyang, J. Biotechnol., 2019, 302, 92-100.
		E. coli	t-CA	643.2 mg/L	Shake-flask	Establishing a biosynthesis pathway with Ptr4Cl5, PtrCcr2 and endogenous reductases	167 K. Venkatesan and K. Srinivasan, Arkivoc, 2008, 16, 302-310.
		E. coli	t-CA	5.0g/L	Shake-flask	A novel artifical pathway: coexpressing NiCar, BsSfp and endogenous Adh, Akrs; combining with a biphasic system to overcome product inhibition	169 E. Klumbys, Z. Zebec, N. J. Weise, N. J. Turner and N. S. Scrutton, Green Chem., 2018, 20, 658-663.
		E. coli	Glucose	501.8 mg/L	Fed-batch	Selection of efficient enzymes (RgTal, At4Cl1, LlCcr and ScAdh6) and reconstructing the biosynthetic pathway under optimized yeast extract concentration	136 T. Furuya, Y. Arai and K. Kino, Applied and environmental microbiology, 2012, 78, 6087-6094.
	Caffeoyl alcohol	E. coli	Glucose	534 mg/L	Fed-batch	Designing microbial co-cultures to prevent HpaBC-induced side reactions; optimizing the strains balance by adjusting the inoculation ratios	136 T. Furuya, Y. Arai and K. Kino, Applied and environmental microbiology, 2012, 78, 6087-6094.
	Coniferyl alcohol	E. coli	Glucose	124.9 mg/L	Shake-flask	Designing microbial co-cultures to prevent HpaBC-induced side reactions; optimizing the strains balance by adjusting the inoculation ratios	136 T. Furuya, Y. Arai and K. Kino, Applied and environmental microbiology, 2012, 78, 6087-6094.
		E. coli	glycerol	187.7 mg/L	Fed-batch	Glycerol as the carbon source and expressing HpaBC, Omt1 and 4Cl4, Ccr1 (both from Arabidopsis thaliana) with endogenous Adh; cultivating in the R/2 medium with ascorbic acid to prevent excess oxidation induced by by-product L-DOPA	170 R. Marchiosi, W. D. dos Santos, R. P. Constantin, R. B. de Lima, A. R. Soares, A. Finger-Teixeira, T. R. Mota, D. M. de Oliveira, M. d. P. Foletto-Felipe and J. Abrahão, Phytochem. Rev., 2020, 19, 865-906.
		S. cerevisiae	Glucose	201.1 mg/L	Fed-batch	Overexpressing seven heterologous enzymes and native enzymes with dual roles	171 S. Y. Park, D. Yang, S. H. Ha and S. Y. Lee, Biotechnol. Bioeng., 2022, 119, 946-962.
		E. coli	Eugenol	53.90 g/L	Fed-batch	Expressing PsVao, ScCta1 with constitutive promoters; optimizing the fermentation by a kinetic model; removing EcoKatE encoding pinoresinol production by the CRISPR/Cas9 system	174 J. P. Wang, B. Liu, Y. Sun, V. L. Chiang and R. R. Sederoff, Front. Plant Sci., 2019, 9, 1942.
Simple coumarins	Umbelliferone	E. coli	glucose, glycerol	2.43 mg/L	Shake-flask	Optimization of gene expression of RgTAL, C2'H, and At4CL1 via a high copy number plasmid	181 K. Kai, M. Mizutani, N. Kawamura, R. Yamamoto, M. Tamai, H. Yamaguchi, K. Sakata and B. i. Shimizu, The Plant Journal, 2008, 55, 989-999.
		E. coli	p-HCA	82.9 mg/L	Shake-flask	Optimization of the initial substrate feeding concentration and cell density	182 Y. Lin, X. Sun, Q. Yuan and Y. Yan, Metab. Eng., 2013, 18, 69-77.
		E. coli	Glucose	66.1 mg/L	Shake-flask	Increasing the pool of tyrosine; deleting a YbgC mutant to prevent the degradation of intermediate CoAs	182 Y. Lin, X. Sun, Q. Yuan and Y. Yan, Metab. Eng., 2013, 18, 69-77.
		E. coli	Glucose	356.59 mg/L	Shake-flask	Bypassing 4CL limitation by virtual screening and site-specific mutagenesis-based protein engineering; gene deletion (encoding PheA, TrpE and TyrR) and overexpression for tyrosine supplementation; systematic optimization of fermentation conditions	183 S.-M. Yang, G. Y. Shim, B.-G. Kim and J.-H. Ahn, Microb. Cell Fact., 2015, 14, 1-12.
	Scopoletin	E. coli	glucose, glycerol	3.06 mg/L	Shake-flask	Co-transferring the plasmid pZE-RgTH-4FO harboring all pathway genes; improving tyrosine production	181 K. Kai, M. Mizutani, N. Kawamura, R. Yamamoto, M. Tamai, H. Yamaguchi, K. Sakata and B. i. Shimizu, The Plant Journal, 2008, 55, 989-999.
		E. coli	FA	79.5 mg/L	Shake-flask	Optimization of cell concentration and the initial substrate feeding concentration	182 Y. Lin, X. Sun, Q. Yuan and Y. Yan, Metab. Eng., 2013, 18, 69-77.
		S. cerevisiae	lignin hydrolysate	4.79 mg/L	Shake-flask	Fusion expression of Pc4Cl and AtF6′h1 combined with sodium hydroxide pretreatment	186 X. Shen, M. Mahajani, J. Wang, Y. Yang, Q. Yuan, Y. Yan and Y. Lin, Metab. Eng., 2017, 42, 59-65.
	Esculetin	E. coli	CaA	52.3 mg/L	Shake-flask	Expression of F6'h and 4Cl under the optimal substrate concentration and cell density	182 Y. Lin, X. Sun, Q. Yuan and Y. Yan, Metab. Eng., 2013, 18, 69-77.
		E. coli	Glucose	61.4 mg/L	Shake-flask	Increasing the accumulation of tyrosine; deleting a YbgC mutant to prevent the degradation of intermediate CoAs	182 Y. Lin, X. Sun, Q. Yuan and Y. Yan, Metab. Eng., 2013, 18, 69-77.
	4-Hydroxycoumarin	E. coli	Glycerol	483.1 mg/L	Shake-flask	An artificial pathway from salicylate; identification of more efficient enzyme (PqsD) by a function-based bioprospecting strategy; modular optimization by adjusting gene organization, copy number and operon configuration	184 Y. Zhao, X. Jian, J. Wu, W. Huang, C. Huang, J. Luo and L. Kong, J. Biol. Eng., 2019, 13, 1-13.
		E. coli	Glycerol	935 mg/L	Shake-flask	Identification and inactivation of the native thioesterase (YdiI) to alleviate acyl-CoA degradation	185 Y. Lin, X. Shen, Q. Yuan and Y. Yan, Nat. Commun., 2013, 4, 2603.
		E. coli	Chorismate	288.8 mg/L	Shake-flask	Designing quorum sensing (QS) circuits to dynamically optimize carbon flux distribution by fine-tuning the timing of each module expression	209 K. B. Xavier and B. L. Bassler, Curr. Opin. Microbiol., 2003, 6, 191-197.
